# Supplementary material
Source: PubMed Central journal article supplement (PMC3228100)
Supplement: supp_the2010-0308_Janku_SuppOnlineTables1-2.pdf [file supp_the2010-0308_Janku_SuppOnlineTables1-2.pdf]

1 **Supplementary Table 1: Association between types of treatment and the achievement of PR in 85 NSCLC patients.**

2

| Types of treatment                                 | N  | PR (%)   | <i>p</i> -value <sup>1</sup> |
|----------------------------------------------------|----|----------|------------------------------|
| <i>Targeted therapy: single agent</i>              | 50 | 1 (2)    | <b>0.002</b>                 |
| <i>Targeted therapy: combinations</i>              | 14 | 1 (7)    |                              |
| <i>Targeted therapy combined with chemotherapy</i> | 13 | 5 (38.5) |                              |
| <i>Chemotherapy</i>                                | 8  | 1 (12.5) |                              |

3

4

5 <sup>1</sup> *p*-value was based on comparing the proportion of patients with a PR among the four treatment groups (Fisher's exact test).

**Supplementary Table 2: The PFS on the first-line therapy, second-line therapy and phase I therapy for advanced/metastatic NSCLC. The median PFS on the first-line therapy was statistically significantly longer than on the second-line and phase I therapies. Also, the median PFS on the second-line therapy was longer than on phase I therapy at borderline statistical significance.**

| Systemic therapy    | Number/Events | Median PFS in months | 95% CI  | <i>p</i> -value <sup>1</sup>              |
|---------------------|---------------|----------------------|---------|-------------------------------------------|
| First-line therapy  | 73/70         | 6.1                  | 5.2–7.6 | $p = 0.010$<br>$p = 0.05$<br>$p < 0.0001$ |
| Second-line therapy | 53/50         | 3.4                  | 2.7–5.4 |                                           |
| Phase I therapy     | 85/79         | 2.8                  | 2.4–3.4 |                                           |

<sup>1</sup> *p*-value by log-rank test.
